# Supplementary material for: Puzzling Out the Genetic Architecture of Endometriosis: Whole-Exome Sequencing and Novel Candidate Gene Identification in a Deeply Clinically Characterised Cohort
Source: MDPI journal article supplement (doi:10.3390/biomedicines11082122), 2023-07-27
Supplement: s1 [file s1]

**Table S2. Complete WES analysis results of the EM patient cohort.** The table reports, for each patient, the rare damaging variants within the selected list of genes and the novel candidates identified through WES analyses. Patient ID: patient unique identifier. Gene: gene name. HGVS coding and protein: cDNA and protein change variant description according to the Human Genome Variation Society (HGVS) nomenclature guidelines. AF: gnomAD allele frequency. PaPI, PolyPhen, SIFT, DANN, dbSNV, SpliceAI: variant effect evaluated by the in-silico prediction tools. \*: stop codon. NA: not available. D: damaging. T: tolerated. In bold are reported the novel candidate genes.

| Patient ID | Gene                 | HGVS coding                          | HGVS protein               | AF       | dbSNP ID     | PaPI | PolyPhen | SIFT | DANN | dbSNV | SpliceAI |
|------------|----------------------|--------------------------------------|----------------------------|----------|--------------|------|----------|------|------|-------|----------|
| 1          | –                    | –                                    | –                          | –        | –            | –    | –        | –    | –    | –     | –        |
| 2          | <i>FCRL3</i>         | NM_052939.3:c.1776_1783dupTCTGCTGC   | p.(His595fs)               | NA       | NA           | D    | NA       | NA   | NA   | NA    | NA       |
| 3          | <i>KAZN</i>          | NM_201628.2:c.236G>A                 | p.(Arg79Gln)               | 0.000049 | rs754907438  | D    | D        | T    | D    | NA    | NA       |
|            | <i>GREB1</i>         | NM_014668.3:c.5780G>A                | p.(Arg1927His)             | 0.000032 | s376907059   | D    | D        | D    | D    | NA    | NA       |
| 4          | <i>RHOJ</i>          | NM_020663.4:c.554C>T                 | p.(Ala185Val)              | 0.000025 | rs145036225  | D    | T        | D    | D    | NA    | NA       |
|            | <i>MAP3K4</i>        | NM_005922.2:c.2566C>A                | p.(Pro856Thr)              | NA       | NA           | D    | D        | T    | D    | NA    | NA       |
| 5          | <i>LAMA5</i>         | NM_005560.4:c.7375G>A                | p.(Ala2459Thr)             | 0.000030 | rs774378028  | D    | D        | T    | D    | NA    | NA       |
| 6          | <b><i>ABCA13</i></b> | NM_152701.3:c.14579G>A               | p.(Gly4860Glu)             | 0.000004 | rs1343617695 | D    | D        | D    | D    | NA    | NA       |
| 7          | <i>NEB</i>           | NM_001164508.1:c.16817A>G            | p.(Tyr5606Cys)             | 0.000098 | rs372049328  | D    | D        | D    | D    | NA    | NA       |
| 8          | <i>GREB1</i>         | NM_014668.3:c.5782G>A                | p.(Asp1928Asn)             | NA       | NA           | D    | D        | D    | D    | NA    | NA       |
|            | <i>NEB</i>           | NM_001164508.1:c.8674C>T             | p.(Leu2892Phe)             | NA       | NA           | D    | D        | T    | D    | NA    | NA       |
| 9          | <b><i>ABCA13</i></b> | NM_152701.3:c.2039A>G                | p.(Asn680Ser)              | 0.000004 | rs1213044373 | T    | T        | D    | D    | NA    | NA       |
|            | <i>IL18</i>          | NM_001562.3:c.113T>C                 | p.(Phe38Ser)               | NA       | NA           | D    | D        | D    | D    | NA    | NA       |
| 10         | <b><i>CSMD1</i></b>  | NM_033225.5:c.2783C>T                | p.(Ala928Val)              | 0.000004 | rs1486469825 | D    | D        | T    | D    | D     | NA       |
| 11         | –                    | –                                    | –                          | –        | –            | –    | –        | –    | –    | –     | –        |
| 12         | <b><i>ABCA13</i></b> | NM_152701.3:c.410_421delGACTTTGGGTAG | p.(Arg137_Glu141delinsLys) | 0.000090 | rs775345564  | D    | NA       | NA   | NA   | NA    | NA       |
|            | <i>LAMA5</i>         | NM_005560.4:c.2185G>A                | p.(Gly729Ser)              | 0.000022 | rs758295582  | D    | D        | D    | D    | NA    | NA       |

|    |               |                                   |                |          |             |    |    |    |    |    |    |
|----|---------------|-----------------------------------|----------------|----------|-------------|----|----|----|----|----|----|
| 13 | <i>NEB</i>    | NM_001164508.1:c.4105G>A          | p.(Glu1369Lys) | 0.000020 | rs779213215 | D  | D  | T  | D  | NA | NA |
|    | <i>ZNF366</i> | NM_152625.1:c.1402G>A             | p.(Val468Met)  | NA       | NA          | D  | D  | T  | D  | NA | NA |
| 14 | <i>IL2RB</i>  | NM_000878.3:c.1640C>G             | p.(Pro547Arg)  | NA       | NA          | D  | D  | D  | D  | NA | NA |
|    | <i>ABCA13</i> | NM_152701.5:c.13246A>G            | p.(Ile4416Val) | 0.000007 | rs761788799 | T  | D  | T  | D  | NA | NA |
|    | <i>LILRB2</i> | NM_001278406.1:c.964C>T           | p.(Arg322Cys)  | 0.000004 | rs768452192 | T  | D  | T  | D  | NA | NA |
| 15 | <i>TYK2</i>   | NM_003331.4:c.3475C>T             | p.(Arg1159Cys) | 0.000012 | rs753470142 | D  | D  | D  | D  | NA | NA |
|    | <i>FCRL3</i>  | NM_052939.3:c.1643A>G             | p.(Asn548Ser)  | 0.000057 | rs140292392 | D  | D  | D  | D  | NA | NA |
| 16 | <i>SYNE2</i>  | NM_182914.2:c.12856A>C            | p.(Ile4286Leu) | 0.000029 | rs763081757 | D  | D  | T  | D  | NA | NA |
| 17 | <i>NEB</i>    | NM_001164508.1:c.4558C>A          | p.(Pro1520Thr) | NA       | NA          | D  | D  | T  | D  | NA | NA |
|    | <i>CSMD1</i>  | NM_033225.5:c.3023T>A             | p.(Ile1008Asn) | NA       | NA          | D  | D  | T  | D  | NA | NA |
| 18 | —             | —                                 | —              | —        | —           | —  | —  | —  | —  | —  | —  |
| 19 | <i>WT1</i>    | NM_024426.6:c.475G>A              | p.(Glu159Lys)  | 0.000034 | rs768165877 | D  | T  | D  | D  | NA | NA |
| 20 | —             | —                                 | —              | —        | —           | —  | —  | —  | —  | —  | —  |
| 21 | —             | —                                 | —              | —        | —           | —  | —  | —  | —  | —  | —  |
| 22 | <i>MMP9</i>   | NM_004994.3:c.1420dupA            | p.(Thr474fs)   | 0.000107 | rs765108149 | D  | NA | NA | NA | NA | NA |
|    | <i>MMP3</i>   | NM_002422.5:c.1153G>A             | p.(Val385Met)  | 0.000393 | rs202217886 | D  | D  | D  | D  | NA | NA |
| 23 | <i>SYNE2</i>  | NM_182914.3:c.18001G>A            | p.(Asp6001Asn) | 0.000119 | rs769737846 | D  | D  | T  | D  | NA | NA |
|    | <i>LAMA5</i>  | NM_005560.6:c.1043C>T             | p.(Ala348Val)  | 0.000040 | rs201517990 | D  | D  | D  | D  | NA | NA |
| 24 | <i>VEZT</i>   | NM_017599.4:c.514T>C              | p.(Trp172Arg)  | 0.000040 | rs757379531 | D  | D  | T  | D  | NA | NA |
|    | <i>C3</i>     | NM_000064.4:c.2951-5_2951-3delTGC | NA             | 0.000742 | rs544122376 | NA | NA | NA | NA | NA | D  |
| 25 | —             | —                                 | —              | —        | —           | —  | —  | —  | —  | —  | —  |
| 26 | <i>SYNE2</i>  | NM_182914.3:c.15757G>T            | p.(Glu5253*)   | NA       | NA          | D  | NA | NA | D  | NA | NA |
| 27 | <i>ABCA13</i> | NM_152701.5:c.13243delC           | p.(Ile4416fs)  | 0.000024 | rs761151004 | D  | NA | NA | NA | NA | NA |

|    |               |                          |                |          |              |   |    |    |   |    |    |
|----|---------------|--------------------------|----------------|----------|--------------|---|----|----|---|----|----|
| 28 | <i>MAP3K4</i> | NM_005922.4:c.2659G>A    | p.(Asp887Asn)  | 0.000014 | rs776867715  | D | D  | T  | D | NA | NA |
| 29 | —             | —                        | —              | —        | —            | — | —  | —  | — | —  | —  |
| 30 | —             | —                        | —              | —        | —            | — | —  | —  | — | —  | —  |
| 31 | <i>ABCA13</i> | NM_152701.5:c.3248T>A    | p.(Met1083Lys) | 0.000032 | rs918676610  | D | T  | D  | D | NA | NA |
|    | <i>ABCA13</i> | NM_152701.5:c.8030T>C    | p.(Ile2677Thr) | NA       | rs778285795  | D | D  | D  | D | NA | NA |
|    | <i>SYNE2</i>  | NM_182914.3:c.16018G>T   | p.(Val5340Phe) | 0.000028 | rs200214648  | D | D  | D  | D | NA | NA |
| 32 | <i>NEB</i>    | NM_001164508.2:c.4289T>A | p.(Ile1430Asn) | 0.000004 | rs773404854  | D | D  | D  | D | NA | NA |
|    | <i>MMP3</i>   | NM_002422.5:c.484T>C     | p.(Ser162Pro)  | 0.000004 | NA           | D | D  | D  | D | NA | NA |
| 33 | <i>NEB</i>    | NM_001164508.2:c.8317C>T | p.(Arg2773Trp) | 0.000036 | rs776175154  | D | D  | D  | D | NA | NA |
| 34 | <i>FCRL3</i>  | NM_052939.4:c.958T>A     | p.(Phe320Ile)  | 0.000012 | rs754875256  | D | D  | D  | D | NA | NA |
| 35 | <i>FCRL3</i>  | NM_052939.4:c.958T>A     | p.(Phe320Ile)  | 0.000012 | rs754875256  | D | D  | D  | D | NA | NA |
| 36 | <i>MMP9</i>   | NM_004994.3:c.1127C>T    | p.(Thr376Ile)  | 0.000004 | rs777794038  | D | D  | T  | D | NA | NA |
| 37 | —             | —                        | —              | —        | —            | — | —  | —  | — | —  | —  |
| 38 | —             | —                        | —              | —        | —            | — | —  | —  | — | —  | —  |
| 39 | —             | —                        | —              | —        | —            | — | —  | —  | — | —  | —  |
| 40 | <i>SYNE1</i>  | NM_182961.4:c.21095A>G   | p.(Gln7032Arg) | 0.000044 | rs752508132  | D | D  | D  | D | NA | NA |
| 41 | —             | —                        | —              | —        | —            | — | —  | —  | — | —  | —  |
| 42 | <i>VEZT</i>   | NM_017599.4:c.1428G>T    | p.(Lys476Asn)  | 0.000185 | rs200452809  | D | T  | D  | D | NA | NA |
| 43 | —             | —                        | —              | —        | —            | — | —  | —  | — | —  | —  |
| 44 | —             | —                        | —              | —        | —            | — | —  | —  | — | —  | —  |
| 45 | <i>SYNE2</i>  | NM_182914.3:c.18565C>T   | p.(Arg6189Trp) | 0.000004 | rs1366404251 | D | D  | D  | D | NA | NA |
| 46 | —             | —                        | —              | —        | —            | — | —  | —  | — | —  | —  |
| 47 | <i>SYNE1</i>  | NM_182961.4:c.16111C>T   | p.(Arg5371*)   | 0.000016 | rs772587027  | D | NA | NA | D | NA | NA |

|    |                |                                     |                        |          |             |   |    |    |    |    |    |
|----|----------------|-------------------------------------|------------------------|----------|-------------|---|----|----|----|----|----|
| 48 | —              | —                                   | —                      | —        | —           | — | —  | —  | —  | —  | —  |
| 49 | —              | —                                   | —                      | —        | —           | — | —  | —  | —  | —  | —  |
| 50 | <i>CYP19A1</i> | NM_000103.4:c.1327G>A               | p.(Ala443Thr)          | 0.000012 | rs201638381 | D | D  | D  | D  | NA | NA |
| 51 | —              | —                                   | —                      | —        | —           | — | —  | —  | —  | —  | —  |
| 52 | —              | —                                   | —                      | —        | —           | — | —  | —  | —  | —  | —  |
| 53 | —              | —                                   | —                      | —        | —           | — | —  | —  | —  | —  | —  |
| 54 | <i>GREB1</i>   | NM_014668.4:c.1241C>T               | p.(Ser414Phe)          | 0.000028 | rs747899314 | D | D  | T  | D  | NA | NA |
| 55 | <i>LAMA5</i>   | NM_005560.6:c.2248G>A               | p.(Val750Met)          | 0.000107 | rs201119098 | D | D  | D  | D  | NA | NA |
| 56 | <i>ABCA13</i>  | NM_152701.5:c.11981C>T              | p.(Ser3994Leu)         | 0.000024 | rs371333701 | D | D  | D  | D  | NA | NA |
| 57 | —              | —                                   | —                      | —        | —           | — | —  | —  | —  | —  | —  |
| 58 | <i>CSMD1</i>   | NM_033225.6:c.4553T>C               | p.(Ile1518Thr)         | 0.000005 | rs756141932 | D | D  | T  | D  | NA | NA |
| 59 | <i>TYK2</i>    | NM_003331.5:c.256C>A                | p.(Pro86Thr)           | 0.000053 | rs141466711 | D | D  | D  | D  | NA | NA |
| 60 | <i>NEB</i>     | NM_001164508.2:c.2771A>C            | p.(Tyr924Ser)          | 0.000247 | rs199903114 | D | D  | D  | D  | NA | NA |
| 61 | <i>NEB</i>     | NM_001164508.2:c.18862G>A           | p.(Val6288Ile)         | 0.000385 | rs201886728 | D | T  | D  | D  | NA | NA |
|    | <i>VEZT</i>    | NM_017599.4:c.1428G>T               | p.(Lys476Asn)          | 0.000185 | rs200452809 | D | T  | D  | D  | NA | NA |
| 62 | <i>CSMD1</i>   | NM_033225.6:c.3333T>A               | p.(Asn1111Lys)         | 0.000049 | rs371414165 | D | D  | T  | D  | NA | NA |
| 63 | <i>MAP3K4</i>  | NM_005922.4:c.2659G>A               | p.(Asp887Asn)          | 0.000014 | rs776867715 | D | D  | T  | D  | NA | NA |
| 64 | <i>MAP3K4</i>  | NM_005922.4:c.2659G>A               | p.(Asp887Asn)          | 0.000014 | rs776867715 | D | D  | T  | D  | NA | NA |
| 65 | —              | —                                   | —                      | —        | —           | — | —  | —  | —  | —  | —  |
| 66 | —              | —                                   | —                      | —        | —           | — | —  | —  | —  | —  | —  |
| 67 | <i>VEGFA</i>   | NM_003376.6:c.337G>C                | p.(Ala113Pro)          | 0.000008 | rs915247074 | D | D  | D  | D  | NA | NA |
|    | <i>IL1A</i>    | NM_000575.5:c.526G>C                | p.(Asp176His)          | 0.000064 | rs1801715   | D | D  | T  | D  | NA | NA |
| 68 | <i>MAP3K4</i>  | NM_005922.4:c.3590_3598dupCTGCTGCTG | p.(Ala1197_Ala1199dup) | 0.000136 | rs763893932 | D | NA | NA | NA | NA | NA |

|    |                      |                        |                |          |             |   |   |   |   |    |    |
|----|----------------------|------------------------|----------------|----------|-------------|---|---|---|---|----|----|
| 69 | <i>RHOJ</i>          | NM_020663.4:c.554C>T   | p.(Ala185Val)  | 0.000025 | rs145036225 | D | T | D | D | NA | NA |
| 70 | <i>VEGFA</i>         | NM_003376.6:c.1184G>C  | p.(Arg395Pro)  | NA       | NA          | D | D | D | D | NA | NA |
| 71 | —                    | —                      | —              | —        | —           | — | — | — | — | —  | —  |
| 72 | —                    | —                      | —              | —        | —           | — | — | — | — | —  | —  |
| 73 | —                    | —                      | —              | —        | —           | — | — | — | — | —  | —  |
| 74 | —                    | —                      | —              | —        | —           | — | — | — | — | —  | —  |
| 75 | <b><i>ABCA13</i></b> | NM_152701.5:c.14185C>T | p.(Arg4729Cys) | 0.000336 | rs185678311 | D | D | T | D | NA | NA |
| 76 | —                    | —                      | —              | —        | —           | — | — | — | — | —  | —  |
| 77 | <i>LAMA5</i>         | NM_005560.6:c.8269G>A  | p.(Ala2757Thr) | 0.000004 | rs762279213 | D | D | D | D | NA | NA |
| 78 | —                    | —                      | —              | —        | —           | — | — | — | — | —  | —  |
| 79 | —                    | —                      | —              | —        | —           | — | — | — | — | —  | —  |
| 80 | <i>C3</i>            | NM_000064.4:c.3431C>T  | p.(Thr1144Met) | 0.000067 | rs150237828 | D | D | D | D | NA | NA |
