# Supplementary material for: Puzzling Out the Genetic Architecture of Endometriosis: Whole-Exome Sequencing and Novel Candidate Gene Identification in a Deeply Clinically Characterised Cohort
Source: MDPI journal article supplement (doi:10.3390/biomedicines11082122), 2023-07-27
Supplement: s1 [file s1]

**Table S3. Burden of genes.** The table shows, for each analyzed individual in the EM cohort and in the control group, the “burden of genes”, defined as the total number of genes in which at least a rare predicted damaging variant was identified, after WES analysis and variants selection. Cohort: name of the cohort to which each analysed individual belongs. Sample ID: individual unique identifier. Burden of genes: for each individual, the total number of genes within the analysed genes in which at least a rare predicted damaging variant was identified, after WES analysis and variants selection.

| Cohort | Sample ID | Burden of genes |
|--------|-----------|-----------------|
| EM     | 1         | 0               |
| EM     | 2         | 1               |
| EM     | 3         | 2               |
| EM     | 4         | 2               |
| EM     | 5         | 1               |
| EM     | 6         | 1               |
| EM     | 7         | 1               |
| EM     | 8         | 2               |
| EM     | 9         | 2               |
| EM     | 10        | 1               |
| EM     | 11        | 0               |
| EM     | 12        | 2               |
| EM     | 13        | 2               |
| EM     | 14        | 3               |
| EM     | 15        | 2               |
| EM     | 16        | 1               |
| EM     | 17        | 2               |
| EM     | 18        | 0               |
| EM     | 19        | 1               |
| EM     | 20        | 0               |
| EM     | 21        | 0               |
| EM     | 22        | 2               |
| EM     | 23        | 2               |
| EM     | 24        | 2               |
| EM     | 25        | 0               |
| EM     | 26        | 1               |
| EM     | 27        | 1               |
| EM     | 28        | 1               |
| EM     | 29        | 0               |
| EM     | 30        | 0               |
| EM     | 31        | 2               |
| EM     | 32        | 2               |
| EM     | 33        | 1               |
| EM     | 34        | 1               |
| EM     | 35        | 1               |
| EM     | 36        | 1               |
| EM     | 37        | 0               |

|    |    |   |
|----|----|---|
| EM | 38 | 0 |
| EM | 39 | 0 |
| EM | 40 | 1 |
| EM | 41 | 0 |
| EM | 42 | 1 |
| EM | 43 | 0 |
| EM | 44 | 0 |
| EM | 45 | 1 |
| EM | 46 | 0 |
| EM | 47 | 1 |
| EM | 48 | 0 |
| EM | 49 | 0 |
| EM | 50 | 1 |
| EM | 51 | 0 |
| EM | 52 | 0 |
| EM | 53 | 0 |
| EM | 54 | 1 |
| EM | 55 | 1 |
| EM | 56 | 1 |
| EM | 57 | 0 |
| EM | 58 | 1 |
| EM | 59 | 1 |
| EM | 60 | 1 |
| EM | 61 | 2 |
| EM | 62 | 1 |
| EM | 63 | 1 |
| EM | 64 | 1 |
| EM | 65 | 0 |
| EM | 66 | 0 |
| EM | 67 | 2 |
| EM | 68 | 1 |
| EM | 69 | 1 |
| EM | 70 | 1 |
| EM | 71 | 0 |
| EM | 72 | 0 |
| EM | 73 | 0 |
| EM | 74 | 0 |
| EM | 75 | 1 |
| EM | 76 | 0 |
| EM | 77 | 1 |
| EM | 78 | 0 |
| EM | 79 | 0 |
| EM | 80 | 1 |

|          |     |   |
|----------|-----|---|
| Controls | 1C  | 0 |
| Controls | 2C  | 0 |
| Controls | 3C  | 1 |
| Controls | 4C  | 0 |
| Controls | 5C  | 0 |
| Controls | 6C  | 0 |
| Controls | 7C  | 1 |
| Controls | 8C  | 1 |
| Controls | 9C  | 1 |
| Controls | 10C | 1 |
| Controls | 11C | 0 |
| Controls | 12C | 0 |
| Controls | 13C | 1 |
| Controls | 14C | 2 |
| Controls | 15C | 1 |
| Controls | 16C | 1 |
| Controls | 17C | 1 |
| Controls | 18C | 0 |
| Controls | 19C | 0 |
| Controls | 20C | 0 |
| Controls | 21C | 1 |
| Controls | 22C | 0 |
| Controls | 23C | 1 |
| Controls | 24C | 1 |
| Controls | 25C | 0 |
| Controls | 26C | 0 |
| Controls | 27C | 1 |
| Controls | 28C | 1 |
| Controls | 29C | 0 |
| Controls | 30C | 1 |
| Controls | 31C | 0 |
| Controls | 32C | 0 |
| Controls | 33C | 1 |
| Controls | 34C | 1 |
| Controls | 35C | 1 |
| Controls | 36C | 1 |
| Controls | 37C | 1 |
| Controls | 38C | 2 |
| Controls | 39C | 0 |
| Controls | 40C | 0 |
| Controls | 41C | 1 |
| Controls | 42C | 1 |
| Controls | 43C | 1 |

|          |     |   |
|----------|-----|---|
| Controls | 44C | 0 |
| Controls | 45C | 0 |
| Controls | 46C | 0 |
| Controls | 47C | 0 |
| Controls | 48C | 1 |
| Controls | 49C | 1 |
| Controls | 50C | 0 |
| Controls | 51C | 0 |
| Controls | 52C | 0 |
| Controls | 53C | 1 |
| Controls | 54C | 3 |
| Controls | 55C | 0 |
| Controls | 56C | 0 |
| Controls | 57C | 0 |
| Controls | 58C | 0 |
| Controls | 59C | 1 |
| Controls | 60C | 1 |
| Controls | 61C | 2 |
| Controls | 62C | 1 |
| Controls | 63C | 2 |
| Controls | 64C | 1 |
| Controls | 65C | 1 |
| Controls | 66C | 1 |
| Controls | 67C | 1 |
| Controls | 68C | 0 |
| Controls | 69C | 2 |
| Controls | 70C | 0 |
| Controls | 71C | 0 |
| Controls | 72C | 0 |
| Controls | 73C | 2 |
| Controls | 74C | 0 |
| Controls | 75C | 1 |
| Controls | 76C | 1 |
| Controls | 77C | 1 |
| Controls | 78C | 0 |
| Controls | 79C | 2 |
| Controls | 80C | 0 |
| Controls | 81C | 0 |
| Controls | 82C | 1 |
| Controls | 83C | 2 |
| Controls | 84C | 1 |
| Controls | 85C | 2 |
| Controls | 86C | 1 |

|          |      |   |
|----------|------|---|
| Controls | 87C  | 0 |
| Controls | 88C  | 0 |
| Controls | 89C  | 0 |
| Controls | 90C  | 0 |
| Controls | 91C  | 0 |
| Controls | 92C  | 0 |
| Controls | 93C  | 0 |
| Controls | 94C  | 0 |
| Controls | 95C  | 2 |
| Controls | 96C  | 0 |
| Controls | 97C  | 1 |
| Controls | 98C  | 1 |
| Controls | 99C  | 0 |
| Controls | 100C | 0 |
| Controls | 101C | 0 |
| Controls | 102C | 0 |
| Controls | 103C | 0 |
| Controls | 104C | 0 |
| Controls | 105C | 0 |
