# Supplementary material for: Puzzling Out the Genetic Architecture of Endometriosis: Whole-Exome Sequencing and Novel Candidate Gene Identification in a Deeply Clinically Characterised Cohort
Source: MDPI journal article supplement (doi:10.3390/biomedicines11082122), 2023-07-27
Supplement: s1 [file s1]

**Table S1. List of the analysed genes by WES.** Gene: Gene name. Encoded protein: name of the encoded protein. Literature references: references and year of publication of the articles describing the gene in relation to EM. The novel candidate genes identified are reported in bold.

| <b>Gene</b>    | <b>Encoded protein</b>                         | <b>Literature references</b>                                                                                                                                                       |
|----------------|------------------------------------------------|------------------------------------------------------------------------------------------------------------------------------------------------------------------------------------|
| <i>ABCA13</i>  | ATP-binding cassette transporter 13            | NA                                                                                                                                                                                 |
| <i>BDNF</i>    | Brain-Derived Neurotrophic Factor              | doi: 10.1177/1933719117732161 (2018),<br>doi: 10.1186/s13048-022-00963-9 (2022),<br>doi: 10.1038/s41588-023-01323-z (2023)                                                         |
| <i>C3</i>      | Complement C3                                  | doi: 10.29271/jcpsp.2019.08.702 (2019),<br>doi: 10.3389/fimmu.2021.693118 (2021)                                                                                                   |
| <i>CCDC170</i> | Coiled-Coil Domain Containing 170              | doi: 10.1038/ncomms15539 (2017),<br>doi: 10.1093/molehr/gaaa082 (2021)                                                                                                             |
| <i>CEP112</i>  | Centrosomal Protein 112                        | doi: 10.1101/406967 (2018),<br><a href="https://doi.org/10.3892/wasj.2023.189">https://doi.org/10.3892/wasj.2023.189</a> (2023)                                                    |
| <i>COX2</i>    | Prostaglandin-Endoperoxide Synthase 2          | <a href="https://doi.org/10.1186/2047-783X-17-12">https://doi.org/10.1186/2047-783X-17-12</a> (2012),<br>doi: 10.7150/ijbs.35128 (2019),<br>doi: 10.1016/j.tjog.2021.05.022 (2021) |
| <i>CSMD1</i>   | CUB And Sushi Multiple Domains 1               | NA                                                                                                                                                                                 |
| <i>CYP19A1</i> | Cytochrome P450 Family 19 Subfamily A Member 1 | doi: 10.3390/ijms21218235 (2020),<br>doi: 10.21873/invivo.11970 (2020),<br>doi: 10.1016/j.ejogrb.2020.05.023 (2020)                                                                |
| <i>ESR1</i>    | Estrogen Receptor 1                            | doi: 10.1038/ncomms15539 (2017),<br>doi: 10.1093/molehr/gaaa082 (2021),<br>doi: 10.1038/s41588-023-01323-z (2023)                                                                  |
| <i>FCRL3</i>   | Fc Receptor Like 3                             | doi: 10.1016/j.humimm.2011.05.005 (2011),<br>doi: 10.1016/j.fertnstert.2012.01.125 (2012),<br>doi: 10.1097/MD.0000000000001168 (2015)                                              |
| <i>FN1</i>     | Fibronectin 1                                  | doi: 10.1136/jmedgenet-2012-101257 (2013),<br>doi: 10.1038/ncomms15539 (2017),<br>doi: 10.3892/mmr.2019.10247 (2019)                                                               |
| <i>FSHB</i>    | Follicle Stimulating Hormone Subunit Beta      | doi: 10.1038/ncomms15539 (2017),<br>doi: 10.3389/fendo.2021.760616 (2021),<br>doi: 10.1038/s41588-023-01323-z (2023)                                                               |
| <i>GREB1</i>   | Growth Regulating Estrogen Receptor Binding 1  | doi: 10.1017/thg.2015.61 (2015),<br>doi: 10.1038/ncomms15539 (2017),<br>doi: 10.3892/mmr.2019.10247 (2019),<br>doi: 10.1038/s41588-023-01323-z (2023)                              |
| <i>HOXA10</i>  | Homeobox A10                                   | doi: 10.1177/1933719118768704 (2018),<br>doi: 10.1186/s13104-018-3836-1 (2018),<br>doi: 10.1177/1933719118766255 (2019),<br>doi: 10.1038/s41588-023-01323-z (2023)                 |
| <i>IL10</i>    | Interleukin 10                                 | doi: 10.4103/1735-1995.166215 (2015),<br>doi: 10.1038/cddis.2017.95 (2017),<br>doi: 10.1093/humrep/deac248 (2023)                                                                  |
| <i>IL15</i>    | Interleukin 15                                 | doi: 10.1530/REP-16-0089 (2016),<br>doi: 10.1074/jbc.RA120.012753 (2020),<br>doi: 10.1016/j.fertnstert.2021.11.024 (2022)                                                          |

|               |                                                  |                                                                                                                                                                                          |
|---------------|--------------------------------------------------|------------------------------------------------------------------------------------------------------------------------------------------------------------------------------------------|
| <i>IL16</i>   | Interleukin 16                                   | doi: 10.1111/iji.12281 (2016),<br>doi: 10.3892/ijmm.2018.3368 (2018),<br><a href="https://doi.org/10.3892/wasj.2023.189">https://doi.org/10.3892/wasj.2023.189</a> (2023)                |
| <i>IL17A</i>  | Interleukin 17A                                  | doi: 10.3389/fimmu.2020.00108 (2020),<br>doi: 10.7150/ijms.71972 (2022),<br>doi: 10.1080/01443615.2023.2199852 (2023)                                                                    |
| <i>IL18</i>   | Interleukin 18                                   | doi: 10.1111/j.1600-0897.2012.01147.x (2012),<br>doi: 10.1016/j.fertnstert.2016.07.005 (2016),<br>doi: 10.2174/0929866525666180412160045 (2018)                                          |
| <i>IL1A</i>   | Interleukin 1 alpha                              | doi: 10.1038/jhg.2013.32 (2013),<br>doi: 10.1093/humrep/deu267 (2015),<br>doi: 10.1080/09513590.2019.1631790 (2020)                                                                      |
| <i>IL1B</i>   | Interleukin 1 beta                               | doi: 10.1016/j.cyto.2015.12.015 (2017),<br>doi: 10.1093/molehr/gaz045 (2019),<br>doi: 10.1093/humrep/deaa017 (2020)                                                                      |
| <i>IL1R1</i>  | Interleukin 1 Receptor Type 1                    | doi: 10.1111/j.1600-0897.2012.01136.x (2012),<br>doi: 10.3389/fimmu.2019.02021 (2019)                                                                                                    |
| <i>IL2RB</i>  | Interleukin 2 Receptor Subunit Beta              | doi: 10.1007/s43032-021-00751-8 (2022),<br>doi: 10.1186/s12916-022-02500-3 (2022)                                                                                                        |
| <i>IL4</i>    | Interleukin 4                                    | doi: 10.1177/1933719115578930 (2015),<br>doi: 10.5114/ceji.2016.60992 (2016)                                                                                                             |
| <i>IL6</i>    | Interleukin 6                                    | doi: 10.3892/etm.2017.4794 (2017),<br>doi: 10.1210/en.2017-00562 (2018),<br>doi: 10.1210/clinem/dgaa096 (2020),<br>doi: 10.1093/molehr/gaab064 (2021)                                    |
| <i>KAZN</i>   | Kazrin                                           | doi: 10.1080/09513590.2018.1499090 (2019),<br>doi: 10.3892/etm.2019.7346 (2019)                                                                                                          |
| <i>KDR</i>    | Kinase Insert Domain Receptor                    | doi: 10.1159/000350665 (2013),<br>doi: 10.1038/ncomms12350 (2016),<br>doi: 10.1016/j.ejogrb.2016.10.046 (2017)                                                                           |
| <i>LAMA5</i>  | Laminin Subunit Alpha 5                          | doi: 10.1016/j.ejogrb.2013.10.007 (2013),<br>doi: 10.1080/09513590.2018.1499090 (2019)                                                                                                   |
| <i>LILRB1</i> | Leukocyte Immunoglobulin Like Receptor B1        | doi: 10.1007/s00438-017-1404-3 (2018),<br>doi: 10.3390/jcm8091468 (2019)                                                                                                                 |
| <i>LILRB2</i> | Leukocyte Immunoglobulin Like Receptor B2        | doi: 10.1007/s00438-017-1404-3 (2018),<br><a href="https://www.spandidos-publications.com/10.3892/wasj.2023.189">https://www.spandidos-publications.com/10.3892/wasj.2023.189</a> (2023) |
| <i>MAP3K4</i> | Mitogen-Activated Protein Kinase Kinase Kinase 4 | doi: 10.1093/humrep/dex024 (2017),<br>doi: 10.1111/jog.14710 (2021),<br><a href="https://doi.org/10.3892/wasj.2023.189">https://doi.org/10.3892/wasj.2023.189</a> (2023)                 |
| <i>MMP2</i>   | Matrix Metalloproteinase 2                       | doi: 10.5604/12321966.1226861 (2016),<br>doi: 10.1371/journal.pone.0163540 (2016)                                                                                                        |
| <i>MMP3</i>   | Matrix Metalloproteinase 3                       | doi: 10.1002/mrd.22931 (2018),<br>doi: 10.1016/j.eurox.2019.100041 (2019),<br>doi: 10.3390/ijms21082840 (2020)                                                                           |
| <i>MMP9</i>   | Matrix Metalloproteinase 9                       | doi: 10.5604/12321966.1226861 (2016),<br>doi: 10.3390/diagnostics10060364 (2020)                                                                                                         |

|               |                                                       |                                                                                                                                                   |
|---------------|-------------------------------------------------------|---------------------------------------------------------------------------------------------------------------------------------------------------|
| <i>NEB</i>    | Nebulin                                               | NA                                                                                                                                                |
| <i>NGF</i>    | Nerve Growth Factor                                   | doi: 10.1016/j.jogoh.2020.101895 (2021),<br>doi: 10.1038/s41588-023-01323-z (2023)                                                                |
| <i>RHOA</i>   | Ras Homolog Family Member A                           | doi: 10.4103/1673-5374.170325 (2015),<br>doi: 10.1111/jcmm.15689 (2020)                                                                           |
| <i>RHOJ</i>   | Ras Homolog Family Member J                           | doi: 10.4103/1673-5374.170325 (2015),<br>doi: 10.1016/j.ejogrb.2017.08.037 (2017)                                                                 |
| <i>RND3</i>   | Rho Family GTPase 3                                   | doi: 10.1002/cphy.c150018 (2015),<br>doi: 10.4103/1673-5374.170325 (2015),<br>doi: 10.3389/fmolb.2021.743012 (2021)                               |
| <i>SKAP1</i>  | Src Kinase Associated Phosphoprotein 1                | doi: 10.1016/j.xhgg.2023.100185 (2023),<br>doi: 10.1038/s41588-023-01323-z (2023)                                                                 |
| <i>SYNE1</i>  | Spectrin Repeat Containing Nuclear Envelope Protein 1 | doi: 10.1038/ncomms15539 (2017),<br>doi: 10.1038/s41588-023-01323-z (2023)                                                                        |
| <i>SYNE2</i>  | Spectrin Repeat Containing Nuclear Envelope Protein 2 | doi: 10.1210/en.2014-1490 (2014),<br>doi: 10.3390/cells10040749 (2021)                                                                            |
| <i>TNF</i>    | Tumor Necrosis Factor                                 | doi: 10.1177/1933719114536472 (2015),<br>doi: 10.1111/aji.13305 (2020)                                                                            |
| <i>TYK2</i>   | Tyrosine Kinase 2                                     | doi: 10.1016/j.humimm.2011.12.009 (2012),<br>doi: 10.1016/j.humimm.2012.09.007 (2013)                                                             |
| <i>VEGF</i>   | Vascular Endothelial Growth Factor A                  | doi: 10.1016/j.fertnstert.2015.12.016 (2016),<br>doi: 10.1007/s11033-019-04807-6. (2019)                                                          |
| <i>VEZT</i>   | Vezeatin                                              | doi: 10.1093/humrep/dev022 (2015),<br>doi: 10.1093/humrep/dew047 (2016),<br>doi: 10.3390/ijms21051765 (2017)                                      |
| <i>WNT4</i>   | Wnt Family Member 4                                   | doi: 10.1007/s10815-015-0523-1 (2015),<br>doi: 10.3892/mmr.2017.7398 (2017)                                                                       |
| <i>WT1</i>    | WT1 Transcription Factor                              | doi: 10.1038/s41588-023-01323-z (2023),<br><a href="https://doi.org/10.3390/reprodmed1010003">https://doi.org/10.3390/reprodmed1010003</a> (2020) |
| <i>ZNF366</i> | Zinc Finger Protein 366                               | doi: 10.1155/2015/461024 (2015),<br>doi: 10.3892/etm.2019.7346 (2019)                                                                             |
